# Supplementary material for: Water increases rates of epoxidation by Mn(iii)porphyrins/imidazole/IO4− in CH2Cl2. Analogy with peroxidase and chlorite dismutase
Source: Royal Society of Chemistry journal article supplement (doi:10.1039/c1dt10689a), 2011-01-01
Supplement: c1dt10689a.pdf [file c1dt10689a.pdf]

## Supplementary Material

Table 1. Epoxidation of cyclooctene by *n*-Bu<sub>4</sub>NIO<sub>4</sub> in the presence of [Mn(TPP)(OAc)] catalysts with or without H<sub>2</sub>O.<sup>[a,b]</sup>

| Mn(TPP)(OAc)   |                                  |                                |                                  |                                   |
|----------------|----------------------------------|--------------------------------|----------------------------------|-----------------------------------|
| Nitrogen Donor | Co Catalyst/Catalyst Molar Ratio | Maximum Epoxidation Yields (%) | Co Catalyst/Catalyst Molar Ratio | Maximum Epoxidation Yields (%)    |
|                |                                  | Without H <sub>2</sub> O, 5h   |                                  | With H <sub>2</sub> O (0.5ml), 3h |
| ImH            | 10                               | 73.3                           | 40                               | 98.0                              |
| 4(5)-MeImH     | 10                               | 58.0                           | 40                               | 64.8                              |
| 2-MeImH        | 10                               | 23.2                           | 40                               | 59.2                              |
| 2-EtImH        | 10                               | 19.6                           | 40                               | 51.5                              |
| 1-MeImH        | 80                               | 10.1                           | 10                               | 10.1                              |

[a] The molar ratio for [Mn(por)]/Nitrogen donors/cyclooctene/periodate was 1:x:83:167 with a concentration of [Mn(por)] of 0.003 M at 23±2 °C.

[b] The epoxidation yields (%) were measured relative to initial cyclooctene. All reactions were run at least in triplicate, and the data represent an average of these reactions with ± 0.8 % (2s).

Table 2. Epoxidation of cyclooctene by  $n\text{-Bu}_4\text{NIO}_4$  in the presence of  $[\text{Mn}(\text{TPFPP})(\text{OAc})]$  catalysts with or without  $\text{H}_2\text{O}$ .<sup>[a,b]</sup>

| <b>Mn(TPFPP)(OAc)</b> |                                         |                                       |                                         |                                        |
|-----------------------|-----------------------------------------|---------------------------------------|-----------------------------------------|----------------------------------------|
| <b>Nitrogen Donor</b> | <b>Co Catalyst/Catalyst Molar Ratio</b> | <b>Maximum Epoxidation Yields (%)</b> | <b>Co Catalyst/Catalyst Molar Ratio</b> | <b>Maximum Epoxidation Yields (%)</b>  |
|                       |                                         | <b>Without H<sub>2</sub>O, 24h</b>    |                                         | <b>With H<sub>2</sub>O (0.5ml), 8h</b> |
| ImH                   | 5                                       | 11.5                                  | 10                                      | 50.4                                   |
| 4(5)-MeImH            | 5                                       | 13.6                                  | 10                                      | 67.8                                   |
| 2-MeImH               | 5                                       | 6.5                                   | 10                                      | 64.5                                   |
| 2-EtImH               | 5                                       | 5.3                                   | 10                                      | 24.6                                   |
| 1-MeImH               | 10                                      | 5.7                                   | 1                                       | 2.9                                    |

[a] The molar ratio for  $[\text{Mn}(\text{por})]$ /Nitrogen donors/cyclooctene/periodate was 1:x:83:167 with a concentration of  $[\text{Mn}(\text{por})]$  of 0.003 M at  $23 \pm 2$  °C.

[b] The epoxidation yields (%) were measured relative to initial cyclooctene. All reactions were run at least in triplicate, and the data represent an average of these reactions with  $\pm 0.8$  % (2s).
